# Supplementary material for: Fixed differences in the 3′UTR of buffalo PRNP gene provide binding sites for miRNAs post-transcriptional regulation
Source: PubMed Central journal article supplement (PMC5542244; doi:10.18632/oncotarget.17545), 2017-05-02
Supplement: oncotarget-08-46006-s001.pdf [file oncotarget-08-46006-s001.pdf]

## Fixed differences in the 3'UTR of buffalo *PRNP* gene provide binding sites for miRNAs post-transcriptional regulation

### SUPPLEMENTARY MATERIALS

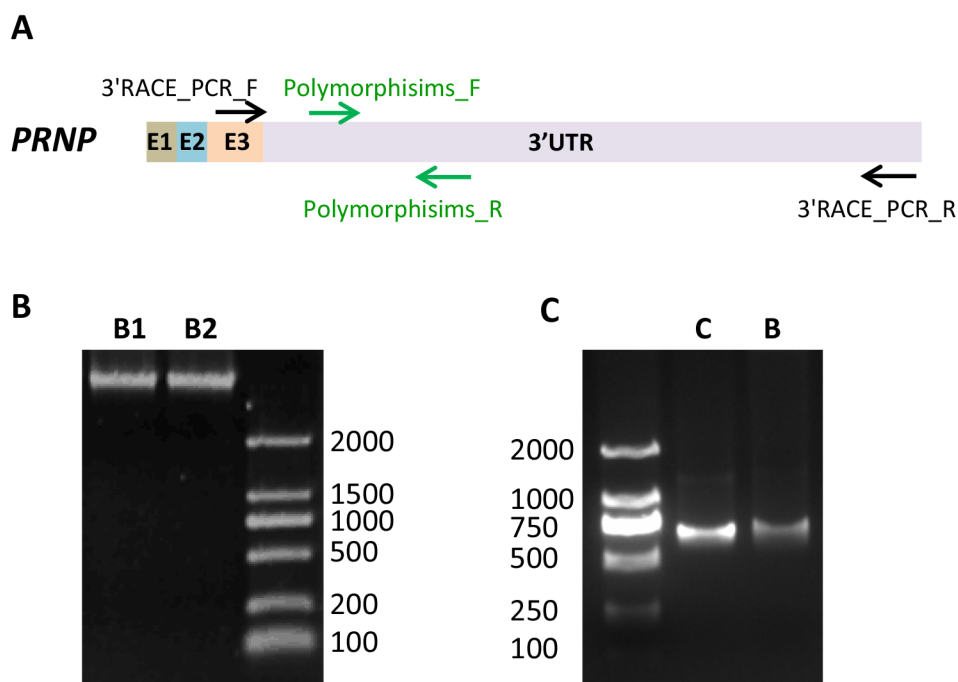

**Supplementary Figure 1: PCR to amplify the 3'UTR of buffalo *PRNP* and the fragments of UTR-C and UTR-B.** (A) The primer pair of 3'RACE\_PCR\_F and 3'RACE\_PCR\_R was developed to amplify the 3'UTR of buffalo *PRNP*. The primers of Polymorphisms\_F and Polymorphisms\_R were used to amplify the fragments of UTR-C and UTR-B for cattle and buffalo *PRNP*, respectively. (B) Representative PCR results for the 3'UTR of buffalo *PRNP* from two buffalo obex tissues (B1 and B2) are shown. (C) The PCR amplicons of UTR-C and UTR-B are presented in agarose gel.

**A**

|                                                                                    |                                                                                    |                                                                                                                                                                                                                     |
|------------------------------------------------------------------------------------|------------------------------------------------------------------------------------|---------------------------------------------------------------------------------------------------------------------------------------------------------------------------------------------------------------------|
| Buffalo                                                                            | GGCAGGAGGGATGCTGGGAAAAA <u>CTGAAGGCAGGAGGAGAGAAGGGGACCACAGAGGATGAG</u>             |                                                                                                                                                                                                                     |
| Cattle                                                                             | GGCAGGAGG-----AGAAGGGGATGACAGAGGATGAG                                              |                                                                                                                                                                                                                     |
| miR-212-5p ( $\Delta\Delta G=4.6$ kcal/mol)                                        |                                                                                    | miR-149-5p ( $\Delta\Delta G=3.9$ kcal/mol)                                                                                                                                                                         |
| 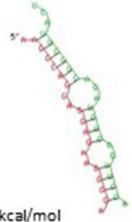  |   |                                                                                                                                   |
| Cattle<br>mfe: -24.2kcal/mol                                                       | Buffalo<br>mfe: -28.8 kcal/mol                                                     | Buffalo<br>mfe: -28.8 kcal/mol                                                                                                                                                                                      |
| miR-324-3p ( $\Delta\Delta G=3.6$ kcal/mol)                                        |                                                                                    | miR-328-3p ( $\Delta\Delta G=1.0$ kcal/mol)                                                                                                                                                                         |
|   |   |                                                                                                                                   |
| Cattle<br>mfe: -19.5 kcal/mol                                                      | Buffalo<br>mfe: -23.1 kcal/mol                                                     | Buffalo<br>mfe: -27.1 kcal/mol                                                                                                                                                                                      |
| miR-668-5p ( $\Delta\Delta G=8.1$ kcal/mol)                                        |                                                                                    | miR-212-5p: 5' ACCUUGGCUCUAGACUGCUUACU 3'<br>miR-149-5p: 5' UCUGGCUCGUGUCUUCACUCCC 3'<br>miR-324-3p: 5' ACUGCCCCAGGUGCUGCUGG 3'<br>miR-328-3p: 5' CUGGCCUCUCUGCCCUUCCGU 3'<br>miR-668-5p: 5' UGCGCCUCGGGUGAGCAUG 3' |
|  |  |                                                                                                                                                                                                                     |
| Cattle<br>mfe: -12.7 kcal/mol                                                      | Buffalo<br>mfe: -20.8 kcal/mol                                                     |                                                                                                                                                                                                                     |

**B**

|                                                                                     |                                                                                     |                                                                                      |
|-------------------------------------------------------------------------------------|-------------------------------------------------------------------------------------|--------------------------------------------------------------------------------------|
| Buffalo                                                                             | ATCGAC <u>AGGGAGTCCTGGTGT</u> CCTG                                                  |                                                                                      |
| Cattle                                                                              | ATCGAC--GGAGTCCTGG <u>CAT</u> CCTG                                                  |                                                                                      |
| miR-27a-3p ( $\Delta\Delta G=2.3$ kcal/mol)                                         |                                                                                     | miR-331-3p ( $\Delta\Delta G=2.4$ kcal/mol)                                          |
|  |  |  |
| Cattle<br>mfe: -17.1 kcal/mol                                                       | Buffalo<br>mfe: -19.4 kcal/mol                                                      | Buffalo<br>mfe: -24.4 kcal/mol                                                       |
| miR-27a-3p: 5' UUCACAGUGGCUAAGUUCGC 3'                                              |                                                                                     | miR-331-3p: 5' GCCCCUGGGCCUAUCCUAGAA 3'                                              |

(Continued)

C

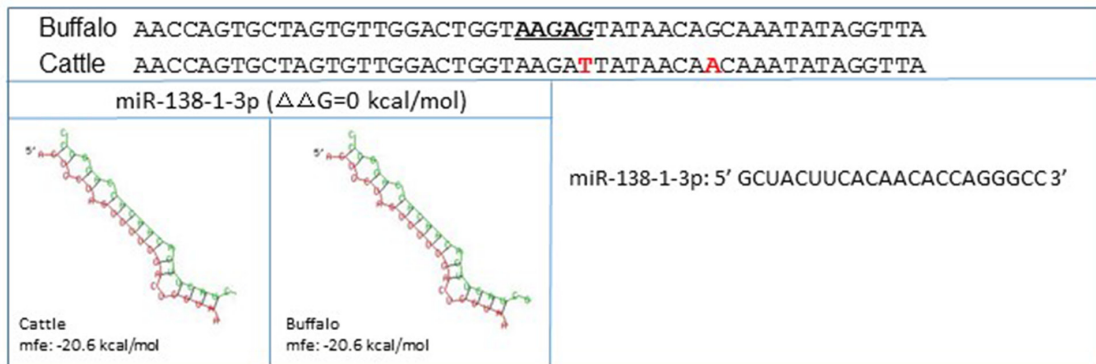

D

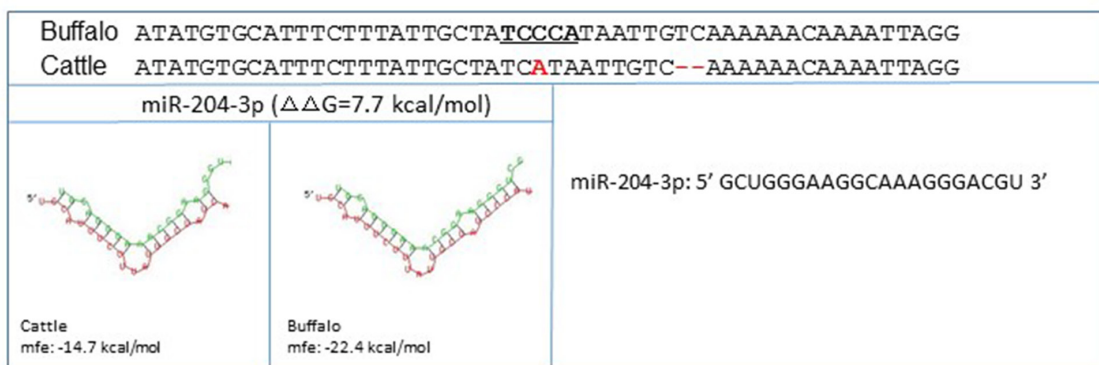

E

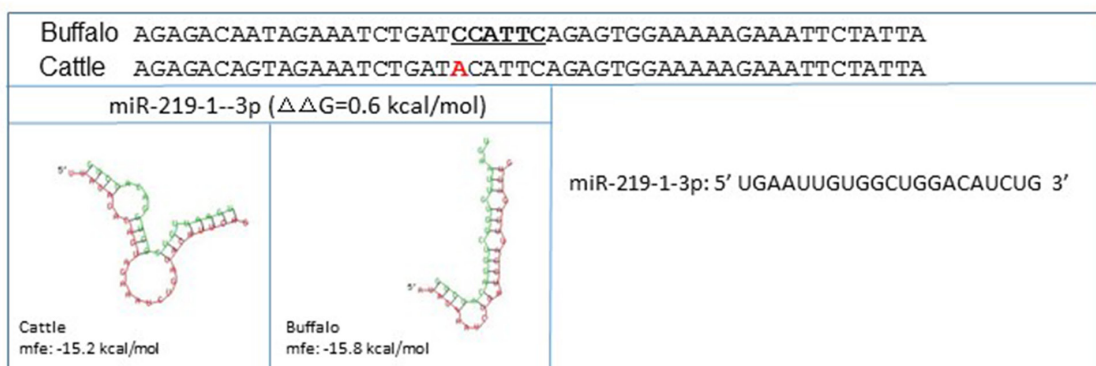

**Supplementary Figure 2: The miRNA-mRNA interaction in the presence of cattle or buffalo *PRNP* allele.** Shown are the predicted miRNAs interact with the fragments from g.961-1020 and g.969-1000 (A), g.1082-1106 and g.1062-1084 (B), g.1222-1271 and g.1204-1253 (C), g.1305-1356 and g.1287-1336 (D), and g.1422-1471 and g.1402-1451 (E) in buffalo and cattle *PRNP* 3'UTR, respectively. The Gibbs-free energy ( $\Delta G$ ) of miRNA-mRNA binding was measured using the RNAhybrid program.  $\Delta\Delta G = \Delta G_{\text{cattle}} - \Delta G_{\text{buffalo}}$ . The miRNA sequence is presented in green and the mRNA sequence in red. The miRNA recognition element in the buffalo mRNA are in bold and underline. The fixed differences in cattle sequence are indicated in red.

|                 |                           |                |                           |
|-----------------|---------------------------|----------------|---------------------------|
| has-miR-125b-5p | uccugagaccuaacuuguga      | has-miR-132-3p | uaacagucuacagccauggucg    |
| mmu-miR-125-5p  | uccugagaccuaacuuguga      | mmu-miR-132-3p | uaacagucuacagccauggucg    |
| rno-miR-125-5p  | uccugagaccuaacuuguga      | rno-miR-132-3p | uaacagucuacagccauggucg    |
| ssc-miR-125     | uccugagaccuaacuuguga      | ssc-miR-132    | uaacagucuacagccauggucg    |
| chi-miR-125-5p  | uccugagaccuaacuugu - -    | bta-miR-132    | uaacagucuacagccauggucg    |
| bta-miR-125     | uccugagaccuaacuuguga      |                |                           |
|                 |                           |                |                           |
| has-miR-145-5p  | guccaguuuuccaggaauccu     | has-miR-331-3p | gccccugggccuauccuagaa -   |
| mmu-miR-145-5p  | guccaguuuuccaggaauccu     | mmu-miR-331-3p | gccccugggccuauccuagaa -   |
| rno-miR-145-5p  | guccaguuuuccaggaauccu     | rno-miR-331-3p | gccccugggccuauccuagaa -   |
| ssc-miR-145-5p  | guccaguuuuccaggaauccu     | ssc-miR-331-3p | gccccugggccuauccuagaa -   |
| chi-miR-145-5p  | guccaguuuuccaggaauccu     | chi-miR-331-3p | - cccccugggccuauccuagaa - |
| bta-miR-145     | guccaguuuuccaggaauccu     | bta-miR-338    | gccccugggccuauccuagaa -   |
|                 |                           |                |                           |
| has-miR-338-3p  | uccagcaucagugauuuuguug -  |                |                           |
| mmu-miR-338-3p  | uccagcaucagugauuuuguug -  |                |                           |
| rno-miR-338-3p  | uccagcaucagugauuuuguuga   |                |                           |
| ssc-miR-338     | uccagcaucagugauuuuguug -  |                |                           |
| chi-miR-338-3p  | uccagcaucagugauuuuguu - - |                |                           |
| bta-miR-338     | uccagcaucagugauuuuguuga   |                |                           |

**Supplementary Figure 3: The evolutionary conservation of five miRNAs.** The miRNA sequences were downloaded from miRBase (<http://www.mirbase.org/>). has-: human; mmu-: mouse; rno-: rat; ssc-: pig; chi-: goat; bta-: cattle.

**Supplementary Table 1: Primers used for amplifying and sequencing the 3'UTR of *PRNP* gene in buffalo**

| PCR Primers                | Primer sequences (5'→3') | Position <sup>a</sup> | Orientation |
|----------------------------|--------------------------|-----------------------|-------------|
| 3'RACE_PCR_F               | AAGATGATGGAGCGAGTG       |                       | F           |
| 3'RACE_PCR_R               | TGGAGTGGGTTGCTATTT       |                       | R           |
| Sequencing Primer_1        | AAGATGATGGAGCGAGTG       | 66221                 | F           |
| Sequencing Primer_2        | ATCCTTAGTTCATAGACCC      | 66720                 | F           |
| Sequencing Primer_3        | TTCCACTCTGAATGTATC       | 67808                 | R           |
| Sequencing Primer_4        | AAGCTGAGTGCTGAAGAA       | 67158                 | F           |
| Sequencing Primer_5        | AGTATTGTCACCTAGCAGAT     | 67863                 | F           |
| Sequencing Primer_6        | GAGCATTGTCACCTAGCAGAT    | 68580                 | R           |
| Sequencing Primer_7        | TTTTGATGAACAGTGGATAC     | 68860                 | F           |
| Sequencing Primer_8        | TGAATACAGCAGGTGAAT       | 69197                 | R           |
| T-vector_sequencing primer | CGCCAGGGTTTTCCCAGTCACGAC |                       | F           |
| T-vector_sequencing primer | AACAGGCTATGACCATG        |                       | R           |

<sup>a</sup> Indicates position in sequence AJ298878 of GeneBank.

**Supplementary Table 2: Overview of the fixed differences in the 3'UTR of *PRNP* gene between cattle and buffalo**

**See Supplementary file 1**

**Supplementary Table 3: Target segment fixed point mutation of *PRNP* 3'UTR**

**See Supplementary file 2**
